1 **Preferential targeting of lateral entorhinal inputs onto newly integrated granule**  
2 **cells**

3  
4 Nicholas I. Woods<sup>1,2,\*</sup>, Christopher E. Vaaga<sup>1,\*</sup>, Christina Chatzi<sup>1</sup>, Jaimie D. Adelson<sup>1</sup>, Matthew  
5 F. Collie<sup>1</sup>, Julia V. Perederiy<sup>1</sup>, Kenneth R. Tovar<sup>1</sup>, Gary L. Westbrook<sup>1</sup>

- 6  
7 1. Vollum Institute, Oregon Health and Science University, 3181 SW Sam Jackson Park  
8 Road, Portland OR, 97239, USA  
9 2. Current Address: Medical Scientist Training Program, University of California San  
10 Francisco, San Francisco CA, 94143, USA

11 \* These authors equally contributed to this work.  
12  
13

14 **Corresponding Author:**

15 Gary L. Westbrook  
16 Vollum Institute, L474  
17 Oregon Health and Science University  
18 3181 SW Sam Jackson Park Road  
19 Portland OR, 97008  
20 [westbroo@ohsu.edu](mailto:westbroo@ohsu.edu)  
21  
22

23 **Keywords:**

24 Dentate gyrus, pattern separation, tetanus toxin, optogenetics, retroviral labeling, synapse  
25 formation, Neurogenesis  
26

27 **Running title:** Preferential targeting of newly integrated neurons  
28

29 **Acknowledgements:** This work was supported by R01 NS080979 and the Ellison Medical  
30 Foundation (GLW) and P30 NS061800. We thank Stefanie Kaech Petrie for help with imaging.  
31 Thanks to Eric Schnell for guidance with electrophysiology. We thank Sue Aicher for assistance  
32 with electron microscopy.  
33  
34

35 **Abstract:**

36 Mature dentate granule cells in the hippocampus receive input from the entorhinal cortex via the  
37 perforant path in precisely arranged lamina, with medial entorhinal axons innervating the middle  
38 molecular layer and lateral entorhinal cortex axons innervating the outer molecular layer.

39 Although vastly outnumbered by mature granule cells, adult-generated newborn granule cells  
40 play a unique role in hippocampal function, which has largely been attributed to their enhanced  
41 excitability and plasticity (Schmidt-Hieber et al., 2004; Ge et al., 2007). Inputs from the medial  
42 and lateral entorhinal cortex carry different informational content, thus the distribution of inputs  
43 onto newly integrated granules will affect their function in the circuit. Therefore we examined the  
44 functional innervation and synaptic maturation of newly-generated dentate granule cells using  
45 retroviral labeling in combination with selective optogenetic activation of medial or lateral  
46 entorhinal inputs. Our results indicate that lateral entorhinal inputs provide nearly all the  
47 functional innervation of newly integrated granule cells. Despite preferential functional targeting,  
48 the dendritic spine density of immature granule cells was not increased in the outer molecular  
49 layer compared to the middle molecular layer. However, chronic blockade of neurotransmitter  
50 release in medial entorhinal axons with tetanus toxin disrupted normal synapse development  
51 from both medial and lateral entorhinal inputs. Our results support a role for preferential lateral  
52 perforant path input onto newly generated neurons in mediating pattern separation, but also  
53 indicates that medial perforant path input is necessary for normal synaptic development.

54

55 **Significance Statement:** The formation of episodic memories involves the integration of  
56 contextual and spatial information. Newly integrated neurons in the dentate gyrus of the  
57 hippocampus play a critical role in this process, despite constituting only a minor fraction of total  
58 granule cells. Here we demonstrate that these neurons preferentially receive information  
59 thought to convey the context of an experience - a unique role that each newly integrated  
60 granule cell serves for about a month before reaching maturity.

61

62



63 **Introduction:**

64 As the entry point to the trisynaptic hippocampal circuit, the dentate gyrus has several  
65 interesting features including a 'sparse' network design (Boss et al., 1985; Rolls et al., 1998),  
66 laminated inputs carrying distinct informational content (Witter, 2007; Knierim et al., 2014), and  
67 participation of mature granule cells alongside the continuous integration of newly-generated  
68 neurons (Overstreet-Wadiche and Westbrook, 2006; Ming and Song, 2011). Hippocampal  
69 granule cells receive highly laminar inputs from entorhinal cortex within the molecular layer of  
70 the dentate gyrus. Input from medial entorhinal cortex, conveying spatial cues, is restricted to  
71 the middle molecular layer (Ferbinteanu et al., 1999; Hafting et al., 2005; Hargreaves et al.,  
72 2005; Yasuda and Mayford, 2006; Witter, 2007; Van Cauter et al., 2013), whereas input from  
73 lateral entorhinal cortex conveying contextual information is restricted to the outer molecular  
74 layer (Hargreaves et al., 2005; Hunsaker et al., 2007; Witter, 2007; Deshmukh and Knierim,  
75 2011; Yoganarasimha et al., 2011; Tsao et al., 2013). Despite being substantially outnumbered  
76 by mature granule cells, newly integrated granule cells are thought to uniquely contribute to  
77 pattern separation (Clelland et al., 2009; Sahay et al., 2011; Nakashiba et al., 2012; Tronel et  
78 al., 2012) - that is, the ability to distinguish between subtly different contexts - one of the primary  
79 functions of the dentate gyrus (Deng et al., 2010; Aimone et al., 2011). This unique function  
80 must occur during a narrow time window between initial integration into the perforant path circuit  
81 (~3 weeks post-mitosis) and complete maturation of synapses (>8 weeks) (van Praag et al.,  
82 2002; Ambrogini et al., 2004; Overstreet et al., 2004; Overstreet-Wadiche et al., 2006; Zhao et  
83 al., 2006; Brunner et al., 2014).

84  
85 The search for unique functions of newly integrated neurons has largely focused on intrinsic  
86 properties, such as enhanced excitability and plasticity (Schmidt-Hieber et al., 2004; Abrous et  
87 al., 2005; Ge et al., 2007; Marín-Burgin et al., 2012; Dieni et al., 2013). However, newborn  
88 neurons also undergo rapid changes in connectivity, which differs from synapse remodeling in  
89 early development (Goodman and Shatz, 1993; Katz and Shatz, 1996; Walsh and Lichtman,  
90 2003), as newborn neurons integrate into an already established circuit (Toni et al., 2007,  
91 2008), and compete for synaptic innervation with pre-existing axons of the perforant path.  
92 Rabies-based circuit mapping suggests that inputs to newly integrated neurons may differ from  
93 mature granule cells (Vivar et al., 2012).

94  
95 Here, we directly assayed synaptic integration of newborn granule cells over the course of  
96 excitatory synapse development using retroviral labeling of newborn neurons and laminar-

97 specific optogenetic stimulation of entorhinal inputs. Our results indicate that newly integrated  
98 granule cells preferentially receive functional synaptic input from lateral entorhinal cortex,  
99 whereas mature granule cells receive balanced input from medial and lateral entorhinal cortex.  
100 Although medial perforant path input was weak in newly integrated granule cells, chronic  
101 silencing of this pathway using tetanus toxin impaired the functional and morphological  
102 development of lateral perforant path inputs.

103  
104

#### 105 **Methods:**

106 *Animals:* We used male and female C57/Bl6 mice. Animal procedures were carried out in  
107 accordance with the Oregon Health and Science University Institutional Animal Care and Use  
108 Committee, Biosafety Committee protocols, and NIH guidelines for the safe handling of animals.

109

110 *Viral Constructs:* To selectively transfect and visualize adult-born hippocampal granule cells, we  
111 used a replication-deficient Moloney Murine Leukemia Virus-based retroviral vector that requires  
112 cell mitosis for transduction (Luikart et al., 2011). The retrovirus contained an internal ubiquitin 6  
113 promoter that drives expression of GFP (viral titer  $10^5$ ) as described previously (Luikart et al.,  
114 2011). To express the light-activated ion channel channelrhodopsin-2 (ChR2) selectively in  
115 entorhinal cortex axons projecting to the middle or outer molecular layer, we stereotaxically  
116 injected an AAV9-CAG-ChR2-eGFP viral construct (UNC Viral Core) into the medial or lateral  
117 entorhinal cortex. To selectively silence axons, we injected a custom AAV-CAG-TeNT-mCherry  
118 virus (viral titer  $10^{13}$ ) made by cloning a 2kb fragment encoding the light chain of tetanus toxin  
119 fused with mCherry into an AAV backbone using InFusion cloning. AAV vectors were serotyped  
120 with AAV9 coat proteins and packaged at the University of North Carolina Vector Core.

121

122 *Stereotaxic Injections:* Stereotaxic viral injections into 6-8 week old male and female C57/Bl6  
123 mice were carried out using a Model 1900 Stereotaxic Alignment System (Kopf). Mice were  
124 anesthetized with 2% isoflurane, and a small incision was created over the skull following  
125 application of artificial tears to the eyes and antibiotic/iodine around the incision site. A Model  
126 1911 Stereotaxic Drill was used to create burr holes over the injection site. pRubi-GFP  
127 retrovirus to label mitotically active granule cells was injected into the dentate gyrus  
128 (coordinates: in mm from bregma): anteroposterior: -1.9, lateromedial: +/- 1.1; dorsoventral: -  
129 2.5, -2.3. One microliter of non-diluted virus was injected at 250 nl/min with a 10  $\mu$ l Hamilton  
130 syringe fitted with a 30-gauge needle using a Quintessential stereotaxic injector (Stoetling).

131 After each injection, the needle was left in place for 1 minute to allow for diffusion of the virus  
132 and prevent backflow. Injections of AAV9-CAG-CHR2-GFP into the lateral entorhinal cortex  
133 were made at anteroposterior: -3.4, lateromedial: +/- 4.0; dorsoventral: -2.4. Injections of AAV9-  
134 CAG-ChR2-GFP or AAV9-CAG-TeNT-mCherry into the medial entorhinal cortex were made at  
135 anteroposterior: -4.5; dorsoventral: +/- 3.0; dorsoventral: -3.2. Following injection, mice received  
136 topical lidocaine and drinking water with cherry-flavored Tylenol, and monitored every 24 hours  
137 over 3 days.

138

139 *Immunohistochemistry and Spine Counts:* Mice were transcardially perfused with ice-cold 4%  
140 sucrose in 0.1 M PBS followed by fixative containing 4% sucrose and 4% paraformaldehyde  
141 (PFA) in PBS. Brains were removed, and postfixed (4% PFA, 1x PBS) overnight at 4°C. The  
142 dorsal hippocampus was sectioned (coronal, 100 µm) using a Leica VT 1000s vibratome.  
143 Sections were permeabilized with 0.4% Triton X-100 in PBS (PBS-T), blocked with filtered 10%  
144 horse serum in PBS-T and incubated in primary antibody overnight in 1.5% horse serum in  
145 PBS-T. Primary antibodies included: 1:300 Alexa-Fluor 488-conjugated rabbit anti-GFP (catalog  
146 no. A21311, Invitrogen), 1:500 anti-VGlu2 (catalog no. 135 404, Synaptic Systems), and 1:500  
147 anti-glia associated fibrillary protein (GFAP; catalog no. Z-0334, DAKO). Sections were then  
148 rinsed with PBS-T and incubated for 2-3 hours at room temperature in PBS-T with secondary  
149 antibodies: 1:300 Alexa Fluor 488-conjugated anti-GFP (A21311, Invitrogen), 1:200 goat anti-  
150 guinea pig Alexa Fluor 568 (A11075, Invitrogen), 1:200 goat anti-rabbit Alexa Fluor 488). The  
151 mCherry-TeNT signal was visualized using native fluorescence. The tissue was counterstained  
152 with DAPI using Fluoromount G with DAPI (SouthernBiotech).

153

154 Images were acquired using either a Zeiss LSM 770 or LSM 780 laser-scanning confocal  
155 microscope on a motorized AxioObserver Z1 inverted scope (Carl Zeiss MicroImaging).  
156 Dendrites for spinal analysis were imaged using a 63x objective (1.4 NA, oil, 2x zoom). For each  
157 imaged cell, dendritic segments in the middle molecular layer and the outer molecular layer  
158 were imaged. The middle and outer molecular layer were distinguished based on VGluT2  
159 immunofluorescence pattern, which begins at the border between the inner molecular layer and  
160 middle molecular layer. Middle molecular layer dendritic segments were therefore imaged at the  
161 beginning of the VGluT2 staining, whereas outer molecular layer dendritic segments were  
162 imaged at the distal tip of the molecular layer. Spine density analysis was performed blinded to  
163 experimental condition. The Cell Counter plugin in FIJI (NIH) was used to count and categorize  
164 spines (Harris et al., 1992), and Simple Neurite Tracer (FIJI) was used to measure dendritic

165 segment length. Spine density and spine type between the middle and outer molecular layer  
166 was compared across conditions (control and TeNT overexpression) and developmental time  
167 points (3-12 weeks post-viral injection). Spine morphology was visually assessed: dendritic  
168 spines containing a spine head (ca. 2x shaft diameter) were considered as mushroom spines  
169 and all other spines were considered filopodia-like.

170

171 *Electrophysiology:* Electrophysiological recordings were made 21 days after viral injection to  
172 allow for construct expression. Acute coronal brain slices were prepared as described  
173 previously (Perederiy et al., 2013). Briefly, animals were anesthetized with an intraperitoneal  
174 injection of 2% 2,2,2-tribromoethanol (0.7-0.8 mL), and transcardially perfused with an ice-cold,  
175 oxygenated modified ACSF which contained (in mM): 110 choline-Cl, 7 MgCl<sub>2</sub>, 2.5 KCl, 1.25  
176 NaH<sub>2</sub>PO<sub>4</sub>, 0.5 CaCl, 1.3 Na-ascorbate, and 25 NaHCO<sub>3</sub>. Hippocampi were resected and cut at  
177 300  $\mu$ m in the transverse axis on a Leica 1200s vibratome. Slices were allowed to incubate for 1  
178 hr in 37°C normal ACSF, which contained (in mM): 125 NaCl, 2.5 KCl, 2.0 CaCl, 1.0 MgCl<sub>2</sub>,  
179 1.25 NaH<sub>2</sub>PO<sub>4</sub>, 25 NaHCO<sub>3</sub>, and 25 glucose.

180

181 We used glass pipettes (2-3 M $\Omega$ ) filled with normal ACSF for extracellular field recording, which  
182 were placed into the lamina of interest. Presynaptic fibers were stimulated using a bipolar  
183 electrode (3-7v, 0.5v steps) or optogenetic stimulation (1ms pulses of 470 nm blue light). Whole-  
184 cell voltage clamp recordings were made using glass pipettes (5-8 M $\Omega$ ). Mature granule cells  
185 were selected based on input resistance less than 750 M $\Omega$  (495 $\pm$ 37 M $\Omega$ ) and soma position in  
186 the outer  $\frac{1}{3}$  of the granule cell layer (Ambrogini et al., 2004; Overstreet-Wadiche and  
187 Westbrook, 2006). The whole-cell recording solution contained (in mM): 100 gluconic acid, 0.2  
188 EGTA, 5 HEPES, 2 Mg-ATP, 0.3 Li-GTP (pH: 7.2, 295 mOsm; adjusted with 50% CsOH such  
189 that final concentration of Cs-gluconate is 100-120 mM). The liquid junction potential (- 7 mV)  
190 was not corrected. Input resistance of the cell was continually monitored with a 10 mV  
191 hyperpolarizing step, and cells with input resistance exceeding 25 M $\Omega$  at any point were  
192 excluded from analysis. Data was acquired at 10 KHz and Bessel filtered at 4 KHz on a  
193 Multiclamp 700B (Axon Instruments, Sunnyvale CA) and recorded using AxographX acquisition  
194 software ([www.axograph.com](http://www.axograph.com)).

195

196 Optogenetic stimulation was provided by an 470 nm LED (ThorLabs, Newton, NJ). Light pulses  
197 (1 ms) were provided through the microscope objective, which was centered over the  
198 appropriate lamina. Optical stimulation was provided over a range of intensities until a maximal

199 response was elicited, which was then used for the remainder of the experiment. Peak EPSC  
200 amplitudes were measured using a built-in routine in AxographX. Miniature EPSCs were  
201 recorded in the presence of SR95531 (10  $\mu$ M) and TTX (1  $\mu$ M) to isolate miniature excitatory  
202 events. Quantal events were detected using a sliding window template consisting of a single  
203 exponential (-10 pA, 1 ms rise time, 6 ms decay time constant). Individual events were then  
204 manually inspected. mEPSC analysis was performed with the experimenter blinded to condition.

205  
206 *Cell Culture:* Mouse hippocampal neurons were cultured on glial micro-islands as described  
207 previously (Tovar et al., 2009). Briefly, neonatal (postnatal day 0-1) male mice were  
208 decapitated, and the hippocampi were dissected. Micro-islands were generated by plating at  
209 125,000 cells/35 mm dish. After 7 days *in vitro*, cultures were treated with 200  $\mu$ M glutamate for  
210 30 min to kill any neurons. Neurons were then plated on the remaining glial feeder layer at  
211 25,000 cells/35 mm dish and maintained in a tissue culture incubator (37°C, 5% CO<sub>2</sub>) until use.  
212 The culture medium consisted of minimum essential media with 2 mM glutaMAX (Invitrogen),  
213 5% heat-inactivated fetal calf serum (Lonza), and 1 ml/l MITO+ Serum Extender (BD  
214 Biosciences). The culture medium was supplemented with glucose to a final concentration of 21  
215 mM. Cultured neurons were transduced at 1 day *in vitro* by replacing 50% of the culture medium  
216 with virus-containing medium (1  $\mu$ L of virus in 500  $\mu$ L medium). After 24 hours, the virus-  
217 containing medium was removed and replaced with fresh complete medium.

218  
219 Whole cell voltage clamp recordings were made from cultured neurons 3-16 days *in vitro*. The  
220 extracellular recording solution consisted of (in mM): 158 NaCl, 2.4 KCl, 1.3 CaCl<sub>2</sub>, 1 MgCl<sub>2</sub>, 10  
221 HEPES and 10 D-glucose (pH 7.4; 320 mosmol). Glass pipettes (2-6 M $\Omega$ ) were filled with a  
222 solution which contained (in mM): 140 K-gluconate, 4 CaCl<sub>2</sub>, 8 Na Cl, 2 MgCl<sub>2</sub>, 10 EGTA, 10  
223 HEPES, 4 Na<sub>2</sub>ATP and 0.2 Na<sub>2</sub>GTP (pH: 7.4, 319 mosmol). Autaptic EPSCs were elicited from  
224 neurons in isolation on a glial micro-island with a brief voltage command (+30 mV, 0.5 ms) to  
225 elicit an unclamped action potential. Recordings were made in the presence of 10  $\mu$ M SR95531  
226 and 10  $\mu$ M (R)-CPP to block GABA<sub>A</sub> and NMDA receptors, respectively. Data was acquired  
227 using an Axopatch 1C amplifier and AxographX ([www.axograph.com](http://www.axograph.com)) acquisition software. In all  
228 recordings, the series resistance was <10 M $\Omega$  and was continuously monitored with a -10 mV  
229 step. Data was low-pass Bessel filtered at 4 kHz and sampled at 10 kHz.

230  
231 *Electron Microscopy:* Ultrastructural analysis of control and TeNT expressing medial perforant  
232 path axons was done 21-days post viral injection, as in Perederiy et al., 2013. Two control

233 (pRubi-expressing) and two pRubi and TeNT-expressing animals were transcardially perfused  
234 with PBS followed by a 3.75% acrolein and 2% paraformaldehyde fixative. The brains were then  
235 extracted and stored in 2% paraformaldehyde for at least 1 hour prior to sectioning at 40  $\mu$ m in  
236 the coronal plane using a Leica VT 1000s vibratome (Leica Microsystems). Sections including  
237 the dorsal hippocampus were incubated in 1% sodium borohydride for 30 minutes to reduce  
238 nonspecific binding, followed by incubation in 10% Triton-X for 45 minutes to increase antibody  
239 penetration. Next, sections were blocked with 0.5% bovine serum albumin for 1 hour followed by  
240 primary antibody incubation directed against pRubi-GFP (Rabbit  $\alpha$ -GFP; 1:500, Millipore Cat #:  
241 AB3080) or TeNT-mCherry (Mouse  $\alpha$ -mCherry; 1-500, Living Colors Cat #: 632543) overnight at  
242 4°C. Following primary antibody incubation, the tissue was thoroughly washed with 0.4% Triton-  
243 X. To visualize GFP, tissue was incubated in biotinylated goat  $\alpha$ -rabbit secondary antibody  
244 (1:200; Vector Laboratories, Cat # BA-1000) for 2 hours at room temperature followed by avidin-  
245 binding complex (Vector Laboratories, Burlingame CA) for 30 minutes then reacted with DAB-  
246 H<sub>2</sub>O<sub>2</sub> solution for 5.5 minutes. To visualize mCherry, the tissue was incubated in goat  $\alpha$ -mouse  
247 gold-conjugated IgG (1:50; Aurion, Cat #: 800.422) for 2 hours at room temperature. Tissue was  
248 then washed with citrate buffer and silver enhanced for 6.5 minutes.

249  
250 Following DAB and/or immunogold reactions, the tissue was fixed in 1% osmium tetroxide for 15  
251 minutes in 0.1 M phosphate buffer. Tissue was then washed and dehydrated through an ethanol  
252 series before being incubated in propylene oxide (10 minutes) and propylene oxide:EMBed (1:1  
253 solution) overnight. Finally, the tissue was embedded in Aclar resin and placed in an oven at  
254 60°C for 24 hours. 700 nm coronal sections were made using a Leica EM UC6 vibratome (Leica  
255 Microsystems). Some sections were mounted on glass slides and stained with toluidine blue in  
256 0.5 % sodium tetraborate to assist in region selection. Tissue from the supra-pyramidal blade of  
257 the dentate gyrus was sectioned at 70 nm using an ultramicrotome (Leica Microsystems).  
258 Sections were placed on 200 square mesh copper/rhodium grids and counterstained with 5%  
259 uranyl acetate and Reynold's lead citrate. The middle molecular layer was imaged at 11,000x  
260 on an FEI Technai G<sup>2</sup> 12 BioTWIN microscope at 80 kV. At least 10 representative images were  
261 selected in both control and TeNT expressing conditions.

262  
263 *Experimental Design and Statistical Analysis:* Male and female mice were used for all  
264 experiments except developmental spine analysis, in which only males were used to provide  
265 more consistent results across animals. All data are reported as mean $\pm$ SEM unless otherwise  
266 noted. Statistical analysis was performed in Prism6 (GraphPad Software, La Jolla, CA). Data



267 were assumed to be normally distributed, in accordance with previous datasets in this circuit.  
268 Spine density data were analyzed using a two-way repeated measures ANOVA (repeated  
269 measures: days post-mitosis, lamina). Pooled data were analyzed using an ANOVA with Holm-  
270 Sidak post-hoc analysis. Electrophysiology data were analyzed using two-tailed unpaired  
271 Student's t-tests. Linear regressions were performed using an Extra-sum of squares F-test.  
272 Sample sizes were chosen to detect an effect size of 20%, based on previous experiments, with  
273 a power of 0.8. Statistical significance was defined as  $\alpha < 0.05$ , and was adjusted for post-hoc  
274 comparisons (Holm-Sidak), as appropriate.

275

276

## 277 **Results**

### 278 *Adult-born granule cells receive preferential input from outer molecular layer axons*

279 To examine the perforant path input onto newborn granule cells, we used electrical and  
280 optogenetic laminar-specific stimulation (Figure 1 A). Targeting of the medial or lateral perforant  
281 path was possible using a bipolar electrode as demonstrated by changes in the polarity of the  
282 field EPSP (Figure 1 B, Andersen et al., 1966). However, optogenetic labeling allows more  
283 precise pathway-specific stimulation. Thus we injected AAV9-CAG-ChR2-eGFP into either  
284 medial or lateral entorhinal cortex, which provided very precise labeling of either the medial or  
285 lateral perforant path fibers in the molecular layer (Figure 1C).

286

287 As expected, in mature cells, there was no difference in the maximal amplitude of light-evoked  
288 EPSCs from the medial (MPP) or lateral perforant path (LPP) (MPP:  $123.0 \pm 24.7$  pA, n=19 cells;  
289 LPP:  $105.9 \pm 31.3$  pA, n=16 cells; Student's unpaired t-test:  $t(33)$ : 0.46,  $p=0.67$ ; Figure 1 D, E),  
290 indicating that mature cells receive robust and balanced excitatory input from both layers.

291 Surprisingly, in newly integrated neurons (retrovirally labeled cells, 21 days post-mitosis), the  
292 strength of lateral perforant path inputs was nearly 10-fold larger than inputs from the medial  
293 perforant path (MPP:  $7.8 \pm 3.1$  pA, n=14 cells; LPP:  $72.2 \pm 15.2$  pA, n=18 cells; Student's unpaired  
294 t-test:  $t(30)$ : 3.68,  $p=0.0009$ ; Figure 1 D, E). The reduced strength of medial perforant path  
295 inputs in newly integrated granule cells was not a result of NMDA-only or 'silent' synapses, as  
296 there was no difference in the AMPA/NMDA ratio between lamina (MPP:  $5.2 \pm 1.3$ , n=13 cells;  
297 LPP:  $3.66 \pm 0.58$ , n=13 cells; Student's unpaired t-test:  $t(24)$ : 1.04;  $p=0.31$ ). These results  
298 indicate that newly integrated neurons receive preferential, but not exclusive, functional input  
299 from the lateral perforant path.

300

301 *Synapse formation in newborn granule cells does not involve competitive elimination*

302 Given the differences in synaptic strength between lateral and medial perforant path axons in  
303 newly integrated granule cells, we examined whether exuberant synapse formation occurs in  
304 the lateral perforant path, followed by competitive elimination and synaptic rebalancing, as seen  
305 during early development (Goodman and Shatz, 1993; Katz and Shatz, 1996; Walsh and  
306 Lichtman, 2003). We labeled mitotically active neurons in 6 week-old male mice with a retroviral  
307 pRUBI-GFP vector (Luikart et al. 2012), then examined spine density in 3 to 12 week-old cells  
308 (at 1 week intervals) in the middle molecular layer (MML) and outer molecular layer (OML).  
309 Despite the functional difference in synapse strength in newly integrated granule cells, there  
310 was no difference in spine density across laminae at any time point (two-way repeated measure  
311 ANOVA:  $F(1,2)$ : 0.195,  $p=0.7$ ). In grouped data from both laminae, the spine density increased  
312 from 3 to 4 weeks post-injection (3 wk:  $0.98 \pm 0.07$  spines/ $\mu\text{m}$ ,  $n=36$  dendritic segments from 3  
313 animals; 4 wk:  $1.52 \pm 0.03$  spines/ $\mu\text{m}$ ,  $n=36$  dendritic segments from 3 animals; Holm-Sidak post-  
314 hoc comparison:  $t(47)$ : 4.5,  $p<0.001$ ; Figure 2 A, B), but then remained unchanged between 4  
315 and 12 weeks post-injection (Holm-Sidak post-hoc comparison:  $p>0.05$ ). The spine density at  
316 12 weeks is within the range of reported values for mature granule cells (Parent et al., 2016).

317  
318 The morphology of dendritic spines also changed during this time period, as there was an  
319 increase in the proportion of spines with filopodial morphology in the middle molecular layer (3  
320 wk:  $13.3 \pm 1.3\%$  of total spines,  $n=14$  cells; 6 wk:  $23.21 \pm 2.6\%$  of total spines,  $n=16$  cells;  
321 Student's unpaired t-test:  $t(28)$ : 3.29,  $p=0.0027$ ; Figure 2 A, C) and outer molecular layer (3 wk:  
322  $12.53 \pm 2.3\%$  of total spines,  $n=10$  cells; 6 wk:  $25.42 \pm 2.6\%$  of total spines,  $n=13$  cells; Student's  
323 unpaired t-test:  $t(21)$ : 3.54,  $p=0.002$ ; Figure 2 A, C). In contrast to spine density, the mEPSC  
324 frequency remained unchanged between 3 and 6 weeks post mitosis (3 wk:  $0.08 \pm 0.02$  Hz,  $n=15$   
325 cells, 6 wk:  $0.05 \pm 0.01$  Hz,  $n=10$  cells; Student's unpaired t-test:  $t(23)$ : 1.32,  $p=0.20$ ; Figure 2 D,  
326 E). At 6 weeks post mitosis, there was a small decrease in the mESPC amplitude (3 wk:  
327  $16.2 \pm 0.8$  pA,  $n=15$  cells; 6 wk:  $13.5 \pm 1.0$  pA,  $n=10$  cells, Student's unpaired t-test:  $t(23)$ : 2.1,  
328  $p=0.045$ , Figure 2 D, F), perhaps consistent with the observed increase in filopodial spines  
329 (Holtmaat and Svoboda, 2009). This data suggests that during this period of functional synaptic  
330 rebalancing, synapse formation by newly integrating granule cells does not involve over-  
331 abundant synapse formation followed by synaptic pruning.

332

333

334



### 335 *Chronic silencing with TeNT*

336 To chronically silence axonal input in a laminar-specific manner, we virally expressed tetanus  
337 toxin light chain (TeNT), which cleaves the SNARE complex protein synaptobrevin-2, thereby  
338 preventing neurotransmitter release (Schiavo et al., 1992). We chose to use tetanus toxin  
339 because it has the advantage of completely silencing axons, with the disadvantage that effects  
340 are irreversible. As the degree of silencing may influence effects on excitatory synapse  
341 formation (Bagley and Westbrook, 2012), we carefully validated our tetanus toxin vector *in vitro*  
342 and *in vivo*. First, we examined AMPA receptor currents in neurons in autaptic cultures (Tovar et  
343 al., 2009). In control cells an unclamped action potential at the soma elicited a large amplitude,  
344 NBQX-sensitive EPSC without failure (n=7 cells; Figure 3 A, B). However, expression of TeNT  
345 by viral transfection completely abolished EPSCs (EPSC success rate:  $0.22\pm 0.2\%$ , n=10 cells,  
346 Student's unpaired t-test:  $t(14): 392.9$   $p<0.0001$ ; Figure 3 A, B).

347  
348 To selectively silence medial perforant path inputs *in vivo*, we injected an AAV9-TeNT-mCherry  
349 virus into the medial entorhinal cortex (Figure 3 C), resulting in robust laminar-specific  
350 expression of TeNT in medial perforant path axons (Figure 3 C, D). TeNT expression was  
351 accompanied by a lamina-specific decrease in VGlut1 immunostaining, a marker of functional  
352 presynaptic terminals (Figure 3 D). Importantly, TeNT expression followed up to 6 weeks *in vivo*  
353 did not elicit an inflammatory response (Figure 3 E), unlike the glial scarring that occurs  
354 following axotomy of medial perforant path axons with subsequent degeneration of terminal  
355 axons (Perederiy et al., 2013). Immunogold electron micrographs of TeNT-expressing axon  
356 terminals had pronounced swelling as well as increased accumulation of small clear vesicles in  
357 presynaptic boutons, consistent with complete block of vesicular release (Figure 3 F, G). TeNT-  
358 expressing axon terminals were directly apposed to dendritic spines, further suggesting that  
359 TeNT-expression did not elicit axon degeneration.

360  
361 To examine the efficiency of silencing of the middle molecular layer, we recorded fEPSP  
362 responses to laminar-specific medial perforant path electrical stimulation in control and TeNT-  
363 expressing slices. Consistent with our *in vitro* results, TeNT markedly reduced the maximal  
364 fEPSP slope (control:  $0.67\pm 0.07$   $\mu\text{V}/\text{ms}$ , n=6 slices; TeNT:  $0.26\pm 0.02$   $\mu\text{V}/\text{ms}$ , n=5 slices;  
365 Student's unpaired t-test:  $t(9): 5.4$ ,  $p=0.0004$ ; Figure 3 H), as well as the input-output  
366 relationship between fiber volley amplitude and fEPSP slope (control:  $0.52\pm 0.003$ ; TeNT:  
367  $0.24\pm 0.01$ ; Extra Sum of Squares F-test:  $F(1,105): 30.4$ ,  $p<0.0001$ ; Figure 3 I). Importantly,  
368 there was no difference in the fiber volley amplitude with maximal stimulation (control: -

369 231.7±36.5  $\mu$ V, n=5 slices; TeNT: -197±29.8  $\mu$ V, n=5 slices; Student's unpaired t-test: t(8): 0.74,  
370 p=0.48), indicating that equal numbers of axons were stimulated in both conditions. The small  
371 residual fEPSP response observed in slices likely indicates that a few medial entorhinal cortex  
372 neurons had not been infected with TeNT.

373

374 *Silencing the middle molecular layer impairs synapse formation with perforant path inputs.*

375 Although the medial perforant path provides only weak input onto newly integrated granule cells,  
376 dendritic spines are present, and thus these inputs could have an activity-dependent effect on  
377 circuit formation. We used laminar-specific silencing with TeNT to address this issue. ChR2-  
378 eGFP was expressed in lateral perforant path axons in conjunction with TeNT-mCherry  
379 expression in the medial perforant path (MPP:TeNT) (Figure 4 A). Interestingly, expression of  
380 TeNT in the medial perforant path reduced the amplitude of lateral perforant path responses in  
381 newly integrated granule cells (control: 72.2±15.2 pA, n=18 cells; MPP:TeNT:8.7±3.7 pA, n=8  
382 cells; Student's unpaired t-test: t(24): 2.7, p=0.011; Figure 4 B, C), but not in mature granule  
383 cells (control: 105.9±31.3 pA, n=16 cells; MPP:TeNT: 125.7±23.24 pA, n=23 cells; Student's  
384 unpaired t-test: t(37): 0.52, p=0.6; Figure 4 B, C). There was also an increase in the paired  
385 pulse ratio of lateral perforant path axons targeting newly integrated granule cells (control PPR:  
386 0.9±0.08, n= 18 cells, MPP:TeNT PPR: 1.8±0.3, n=8 cells; Student's unpaired t-test: t(24): 4.3,  
387 p=0.0003; Figure 4 B, D). This change was not observed in mature granule cells (control PPR:  
388 1.1±0.07, n= 16 cells; MPP:TeNT PPR: 1.4±0.2, n=23 cells, Student's unpaired t-test: t(37):  
389 1.38, p=0.17; Figure 4 B, D).

390

391 Silencing of the medial perforant path also reduced the spine density of newly integrated  
392 granule cells in both the middle molecular layer (control: 0.95±0.04 spines/ $\mu$ m, n=24 dendritic  
393 segments from 4 animals; MPP:TeNT: 0.51±0.05 spines/ $\mu$ m, n=24 dendritic segments from 4  
394 animals; Student's unpaired t-test: t(6): 7.12, p=0.0004; Figure 4 F, G) and outer molecular layer  
395 (control: 0.93±0.03 spines/ $\mu$ m, n=24 dendritic segments from 4 animals; MPP:TeNT: 0.54±0.02  
396 spines/ $\mu$ m, n=24 dendritic segments from 4 animals; Student's unpaired t-test: t(6): 11.01,  
397 p<0.0001; Figure 4 F, G). Together these results suggest that although the axons of the medial  
398 perforant path make little contribution to the synaptic activation of adult-born granule cells, intact  
399 synaptic release from medial perforant path axons is required for proper functional synaptic  
400 integration of adult-born granule cells.

401

402

## 403 **Discussion**

404 There is general consensus that newborn neurons, once they integrate into the dentate gyrus  
405 network, have a unique role in memory formation (Aimone et al., 2006; Saxe et al., 2006; Kee et  
406 al., 2007). Newborn neurons go through a relatively stereotyped maturation post-mitosis,  
407 including early GABAergic depolarization without excitatory perforant input for several weeks  
408 (Ge et al., 2006) as their dendrites extend through the molecular layer (Zhao et al., 2006) . Prior  
409 results have suggested a contribution of enhanced excitability and synaptic plasticity as a  
410 reason that such a minor population can have a major impact on circuit function (Schmidt-  
411 Hieber et al., 2004; Aimone et al., 2011). However, monosynaptic labeling studies using  
412 modified rabies virus (Vivar et al., 2012) suggest that newborn neurons may have distinct  
413 connectivity as well, with extrinsic excitatory input onto newborn neurons originating primarily  
414 from the lateral entorhinal cortex. Our results indicate that newly integrated neurons receive  
415 preferential functional input from the lateral entorhinal cortex, which likely contributes to their  
416 role in pattern separation. Yet our data also show that preferential targeting must occur during a  
417 well-defined time window followed by functional synaptic reorganization that results in balanced  
418 input from medial and lateral entorhinal cortex.

419

### 420 *The preferential input onto newly generated granule cells*

421 Episodic memory requires both spatial and non-spatial information, which are differentially  
422 encoded in medial and lateral entorhinal cortex, respectively (Ferbinteanu et al., 1999; Hafting  
423 et al., 2005; Hargreaves et al., 2005; Yasuda and Mayford, 2006; Hunsaker et al., 2007;  
424 Deshmukh and Knierim, 2011; Yoganarasimha et al., 2011; Tsao et al., 2013; Van Cauter et al.,  
425 2013). Thus the strict laminar organization in the molecular layer provides a framework in which  
426 distinct populations of granule cells or different regions of the dendritic tree, proximal vs distal,  
427 may differentially affect circuit function (Magee, 2000; Dieni et al., 2013, 2016). In this setting,  
428 the combination of the observed preferential functional targeting of lateral entorhinal cortex  
429 inputs onto newly integrated granule cells complements their well-documented enhanced  
430 plasticity (Schmidt-Hieber et al., 2004; Abrous et al., 2005; Ge et al., 2007) in mediating distinct  
431 aspects of memory formation (Clelland et al., 2009; Sahay et al., 2011; Nakashiba et al., 2012;  
432 Tronel et al., 2012). For example, this may fit with the role of newly integrated neurons as  
433 novelty detectors for incoming contextual information, the essence of pattern separation (Deng  
434 et al., 2010; Aimone et al., 2011). The preferential input from lateral entorhinal cortex indicates  
435 that information processing in newly integrated neurons is functionally distinct from mature  
436 neurons. Although the specific information carried by the lateral and medial perforant path is

437 likely to be more complex than a simple segregation of spatial and contextual input (Knierim et  
438 al., 2014), the strict anatomical lamination of the molecular layer suggests that the two inputs  
439 remain segregated along the dendritic tree of granule cells.

440

441 Despite the weak input from the medial perforant path, in our experiments there was no  
442 difference in spine density on newly integrated granule cells between middle and outer  
443 molecular layers. At the synaptic level, the preferential functional input could not be attributed to  
444 an increase in 'silent synapses' (Isaac et al., 1995; Carroll and Malenka, 2000; Ziv and Garner,  
445 2001; Feldman, 2009), as there was no difference in the AMPA/NMDA ratio between medial  
446 and lateral perforant path inputs. Perhaps surprisingly, the presence of the same density of  
447 spines within the middle molecular layer indicates spine morphology is dissociated from  
448 functional synaptic strength in newly generated granule cells. Although presynaptic axon  
449 terminals generally co-localize with postsynaptic spines, spine formation can be temporally  
450 distinct from functional synapse formation (Yuste and Bonhoeffer, 2004). In fact, following  
451 lesions of the perforant path, newly integrated granule cells continue to form dendritic spines  
452 despite the loss of presynaptic axon terminals (Perederiy et al., 2013; see also Sando et al.,  
453 2017). Furthermore, excitatory synapses may initially form on dendritic shafts as opposed to  
454 spines (Crain et al., 1973; Miller and Peters, 1981; Mates and Lund, 1983; Yuste and  
455 Bonhoeffer, 2004; Fortin et al., 2014), which may explain why the mEPSC frequency did not  
456 increase between 3 and 6 weeks post-mitosis in our experiments.

457

#### 458 *The role of the medial perforant path*

459 Our results indicate medial perforant path inputs are necessary for normal synapse formation of  
460 all perforant path inputs on newly integrated granule cells. Adult-born granule cells in the  
461 hippocampus share many properties with immature neurons during development (Schmidt-  
462 Hieber et al., 2004; Abrous et al., 2005; Ge et al., 2007), but are unique in that they must  
463 integrate into a pre-existing circuit (Ge et al., 2007; Toni et al., 2007; Adlaf et al., 2017). The  
464 preferential functional targeting by the lateral entorhinal cortex is somewhat surprising from a  
465 developmental perspective given that as newborn cells mature, their dendrites first pass through  
466 the middle molecular layer, which is occupied by axons innervating mature granule cells. Inputs  
467 from the medial entorhinal cortex were weak in newly integrated neurons, perhaps explaining  
468 why it was not detected in rabies tracing studies of 21 days post-mitosis granule cells (Vivar et  
469 al., 2012). However, chronic silencing of medial perforant path inputs with tetanus toxin nearly  
470 eliminated the strong input from the lateral entorhinal cortex without affecting the lamination of

471 incoming axons. The effect of silencing was selective for inputs onto newly generated neurons  
472 and occurred even though not every axon in the medial perforant path expressed tetanus, as  
473 estimated from the residual field EPSP. Silencing the medial perforant path was accompanied  
474 by a reduction in spine density in both the middle and outer molecular layer, although the  
475 reduction in synaptic strength was greater than the reduction in spine density. Interestingly, this  
476 pattern contrasts with homeostatic plasticity observed in some circuits (Davis, 2013). Given the  
477 weak nature of this input, it may be that factors other than net neural activity contribute to the  
478 developmental role of the medial perforant path inputs (i.e. neurotrophic factors; (Huang and  
479 Reichardt, 2001; Cohen-Cory et al., 2010).

480

#### 481 *Comparison to synapse formation during early development*

482 The existence of activity- and competition-dependent synapse remodeling is well mapped in the  
483 immature brain as neural circuits first develop (Goodman and Shatz, 1993; Katz and Shatz,  
484 1996; Walsh and Lichtman, 2003). In many developing brain circuits, neurons initially form an  
485 overabundance of weak synapses which are later pruned in a competition-dependent manner,  
486 resulting in the retention of strong synaptic inputs (Bear, 1995; Knudsen, 2004; Majewska and  
487 Sur, 2006; Bhatt et al., 2009; Feldman, 2009). Such activity-dependent synaptic competition is  
488 critical in the formation of mature, functional circuits (LeVay et al., 1980; Walsh and Lichtman,  
489 2003; Datwani et al., 2009). These processes of synapse pruning and redistribution occur  
490 during critical periods of development, when incoming patterns of activity strongly influence  
491 circuit remodeling (Malenka and Bear, 2004; Holtmaat and Svoboda, 2009; Caroni et al., 2014).  
492 However, in the adult brain, such circuit plasticity is more limited (Tagawa et al., 2005; Sato and  
493 Stryker, 2008), suggesting that the basic pattern of initial synapse formation and subsequent  
494 remodeling/refinement in adult-born cells may be distinct. Indeed we did not see a period of  
495 synaptic overabundance as newly integrated cells reached maturity. Rather the period of  
496 synaptic 'competition' for newly integrating neurons reflects a rebalancing of functional inputs  
497 across the molecular layer. Remodeling in the adult environment is relevant not only to  
498 neurogenic niches, but also to repair after neural injury or cell transplantation approaches  
499 (Lindvall and Kokaia, 2006; Lepousez et al., 2015).

500

501

502

503

504

505 **References:**

- 506 Abrous DN, Koehl M, Le Moal M (2005) Adult neurogenesis: from precursors to network and  
507 physiology. *Physiol Rev* 85:523–569.
- 508 Adlaf EW, Vaden RJ, Niver AJ, Manuel AF, Onyilo VC, Araujo MT, Dieni CV, Vo HT, King GD,  
509 Wadiche JI, Overstreet-Wadiche L (2017) Adult-born neurons modify excitatory synaptic  
510 transmission to existing neurons. *Elife* 6 Available at: <http://dx.doi.org/10.7554/eLife.19886>.
- 511 Aimone JB, Deng W, Gage FH (2011) Resolving new memories: a critical look at the dentate  
512 gyrus, adult neurogenesis, and pattern separation. *Neuron* 70:589–596.
- 513 Aimone JB, Wiles J, Gage FH (2006) Potential role for adult neurogenesis in the encoding of  
514 time in new memories. *Nat Neurosci* 9:723–727.
- 515 Ambrogini P, Lattanzi D, Ciuffoli S, Agostini D, Bertini L, Stocchi V, Santi S, Cuppini R (2004)  
516 Morpho-functional characterization of neuronal cells at different stages of maturation in  
517 granule cell layer of adult rat dentate gyrus. *Brain Res* 1017:21–31.
- 518 Bagley EE, Westbrook GL (2012) Short-term field stimulation mimics synaptic maturation of  
519 hippocampal synapses. *J Physiol* 590:1641–1654.
- 520 Bear MF (1995) Mechanism for a sliding synaptic modification threshold. *Neuron* 15:1–4.
- 521 Bhatt DH, Zhang S, Gan W-B (2009) Dendritic spine dynamics. *Annu Rev Physiol* 71:261–282.
- 522 Boss BD, Peterson GM, Cowan WM (1985) On the number of neurons in the dentate gyrus of  
523 the rat. *Brain Res* 338:144–150.
- 524 Brunner J, Neubrandt M, Van-Weert S, András T, Kleine Borgmann FB, Jessberger S,  
525 Szabadics J (2014) Adult-born granule cells mature through two functionally distinct states.  
526 *Elife* 3:e03104.
- 527 Caroni P, Chowdhury A, Lahr M (2014) Synapse rearrangements upon learning: from divergent-  
528 sparse connectivity to dedicated sub-circuits. *Trends Neurosci* 37:604–614.
- 529 Carroll RC, Malenka RC (2000) Delivering the goods to synapses. *Nat Neurosci* 3:1064–1066.
- 530 Clelland CD, Choi M, Romberg C, Clemenson GD Jr, Fragniere A, Tyers P, Jessberger S,  
531 Saksida LM, Barker RA, Gage FH, Bussey TJ (2009) A functional role for adult  
532 hippocampal neurogenesis in spatial pattern separation. *Science* 325:210–213.
- 533 Cohen-Cory S, Kidane AH, Shirkey NJ, Marshak S (2010) Brain-derived neurotrophic factor and  
534 the development of structural neuronal connectivity. *Dev Neurobiol* 70:271–288.
- 535 Crain B, Cotman C, Taylor D, Lynch G (1973) A quantitative electron microscopic study of  
536 synaptogenesis in the dentate gyrus of the rat. *Brain Res* 63:195–204.
- 537 Datwani A, McConnell MJ, Kanold PO, Micheva KD, Busse B, Shamloo M, Smith SJ, Shatz CJ  
538 (2009) Classical MHCI molecules regulate retinogeniculate refinement and limit ocular  
539 dominance plasticity. *Neuron* 64:463–470.



- 540 Davis GW (2013) Homeostatic signaling and the stabilization of neural function. *Neuron* 80:718–  
541 728.
- 542 Deng W, Aimone JB, Gage FH (2010) New neurons and new memories: how does adult  
543 hippocampal neurogenesis affect learning and memory? *Nat Rev Neurosci* 11:339–350.
- 544 Deshmukh SS, Knierim JJ (2011) Representation of non-spatial and spatial information in the  
545 lateral entorhinal cortex. *Front Behav Neurosci* 5:69.
- 546 Dieni CV, Nietz AK, Panichi R, Wadiche JI, Overstreet-Wadiche L (2013) Distinct determinants  
547 of sparse activation during granule cell maturation. *J Neurosci* 33:19131–19142.
- 548 Dieni CV, Panichi R, Aimone JB, Kuo CT, Wadiche JI, Overstreet-Wadiche L (2016) Low  
549 excitatory innervation balances high intrinsic excitability of immature dentate neurons. *Nat*  
550 *Commun* 7:11313.
- 551 Feldman DE (2009) Synaptic mechanisms for plasticity in neocortex. *Annu Rev Neurosci* 32:33–  
552 55.
- 553 Ferbinteanu J, Holsinger RM, McDonald RJ (1999) Lesions of the medial or lateral perforant  
554 path have different effects on hippocampal contributions to place learning and on fear  
555 conditioning to context. *Behav Brain Res* 101:65–84.
- 556 Fortin DA, Tillo SE, Yang G, Rah J-C, Melander JB, Bai S, Soler-Cedeño O, Qin M, Zemelman  
557 BV, Guo C, Mao T, Zhong H (2014) Live imaging of endogenous PSD-95 using ENABLED:  
558 a conditional strategy to fluorescently label endogenous proteins. *J Neurosci* 34:16698–  
559 16712.
- 560 Ge S, Goh ELK, Sailor KA, Kitabatake Y, Ming G-L, Song H (2006) GABA regulates synaptic  
561 integration of newly generated neurons in the adult brain. *Nature* 439:589–593.
- 562 Ge S, Yang C-H, Hsu K-S, Ming G-L, Song H (2007) A critical period for enhanced synaptic  
563 plasticity in newly generated neurons of the adult brain. *Neuron* 54:559–566.
- 564 Goodman CS, Shatz CJ (1993) Developmental mechanisms that generate precise patterns of  
565 neuronal connectivity. *Cell* 72 Suppl:77–98.
- 566 Hafting T, Fyhn M, Molden S, Moser M-B, Moser EI (2005) Microstructure of a spatial map in  
567 the entorhinal cortex. *Nature* 436:801–806.
- 568 Hargreaves EL, Rao G, Lee I, Knierim JJ (2005) Major dissociation between medial and lateral  
569 entorhinal input to dorsal hippocampus. *Science* 308:1792–1794.
- 570 Harris KM, Jensen FE, Tsao B (1992) Three-dimensional structure of dendritic spines and  
571 synapses in rat hippocampus (CA1) at postnatal day 15 and adult ages: implications for the  
572 maturation of synaptic physiology and long-term potentiation [published erratum appears in  
573 *J Neurosci* 1992 Aug; 12 (8): following table of contents]. *Journal of Neuroscience*  
574 12:2685–2705.
- 575 Holtmaat A, Svoboda K (2009) Experience-dependent structural synaptic plasticity in the  
576 mammalian brain. *Nat Rev Neurosci* 10:647–658.
- 577 Huang EJ, Reichardt LF (2001) Neurotrophins: roles in neuronal development and function.

- 578 Annu Rev Neurosci 24:677–736.
- 579 Hunsaker MR, Mooy GG, Swift JS, Kesner RP (2007) Dissociations of the medial and lateral  
580 perforant path projections into dorsal DG, CA3, and CA1 for spatial and nonspatial (visual  
581 object) information processing. Behav Neurosci 121:742–750.
- 582 Isaac JT, Nicoll RA, Malenka RC (1995) Evidence for silent synapses: implications for the  
583 expression of LTP. Neuron 15:427–434.
- 584 Katz LC, Shatz CJ (1996) Synaptic activity and the construction of cortical circuits. Science  
585 274:1133–1138.
- 586 Kee N, Teixeira CM, Wang AH, Frankland PW (2007) Preferential incorporation of adult-  
587 generated granule cells into spatial memory networks in the dentate gyrus. Nat Neurosci  
588 10:355–362.
- 589 Knierim JJ, Neunuebel JP, Deshmukh SS (2014) Functional correlates of the lateral and medial  
590 entorhinal cortex: objects, path integration and local-global reference frames. Philos Trans  
591 R Soc Lond B Biol Sci 369:20130369.
- 592 Knudsen EI (2004) Sensitive periods in the development of the brain and behavior. J Cogn  
593 Neurosci 16:1412–1425.
- 594 Lepousez G, Nissant A, Lledo P-M (2015) Adult neurogenesis and the future of the rejuvenating  
595 brain circuits. Neuron 86:387–401.
- 596 LeVay S, Wiesel TN, Hubel DH (1980) The development of ocular dominance columns in  
597 normal and visually deprived monkeys. J Comp Neurol 191:1–51.
- 598 Lindvall O, Kokaia Z (2006) Stem cells for the treatment of neurological disorders. Nature  
599 441:1094–1096.
- 600 Luikart BW, Schnell E, Washburn EK, Bensen AL, Tovar KR, Westbrook GL (2011) Pten  
601 knockdown in vivo increases excitatory drive onto dentate granule cells. J Neurosci  
602 31:4345–4354.
- 603 Magee JC (2000) Dendritic integration of excitatory synaptic input. Nat Rev Neurosci 1:181–  
604 190.
- 605 Majewska AK, Sur M (2006) Plasticity and specificity of cortical processing networks. Trends  
606 Neurosci 29:323–329.
- 607 Malenka RC, Bear MF (2004) LTP and LTD: an embarrassment of riches. Neuron 44:5–21.
- 608 Marín-Burgin A, Mongiat LA, Pardi MB, Schinder AF (2012) Unique processing during a period  
609 of high excitation/inhibition balance in adult-born neurons. Science 335:1238–1242.
- 610 Mates SL, Lund JS (1983) Spine formation and maturation of type 1 synapses on spiny stellate  
611 neurons in primate visual cortex. J Comp Neurol 221:91–97.
- 612 Miller M, Peters A (1981) Maturation of rat visual cortex. II. A combined Golgi-electron  
613 microscope study of pyramidal neurons. J Comp Neurol 203:555–573.



- 614 Ming G-L, Song H (2011) Adult neurogenesis in the mammalian brain: significant answers and  
615 significant questions. *Neuron* 70:687–702.
- 616 Nakashiba T, Cushman JD, Pelkey KA, Renaudineau S, Buhl DL, McHugh TJ, Rodriguez  
617 Barrera V, Chittajallu R, Iwamoto KS, McBain CJ, Fanselow MS, Tonegawa S (2012)  
618 Young dentate granule cells mediate pattern separation, whereas old granule cells facilitate  
619 pattern completion. *Cell* 149:188–201.
- 620 Overstreet LS, Hentges ST, Bumashny VF, de Souza FSJ, Smart JL, Santangelo AM, Low MJ,  
621 Westbrook GL, Rubinstein M (2004) A transgenic marker for newly born granule cells in  
622 dentate gyrus. *J Neurosci* 24:3251–3259.
- 623 Overstreet-Wadiche LS, Bensen AL, Westbrook GL (2006) Delayed development of adult-  
624 generated granule cells in dentate gyrus. *J Neurosci* 26:2326–2334.
- 625 Overstreet-Wadiche LS, Westbrook GL (2006) Functional maturation of adult-generated granule  
626 cells. *Hippocampus* 16:208–215.
- 627 Parent AS, Pinson A, Woods N, Chatzi C, Vaaga CE, Bensen A, Gérard A, Thome JP,  
628 Bourguignon JP, Westbrook GL (2016) Early exposure to Aroclor 1254 in vivo disrupts the  
629 functional synaptic development of newborn hippocampal granule cells. *Eur J Neurosci*  
630 44:3001–3010.
- 631 Perederiy JV, Luikart BW, Washburn EK, Schnell E, Westbrook GL (2013) Neural injury alters  
632 proliferation and integration of adult-generated neurons in the dentate gyrus. *J Neurosci*  
633 33:4754–4767.
- 634 Rolls ET, Treves A, Rolls ET (1998) Neural networks and brain function. Available at:  
635 [http://www.oxcns.org/papers/Rolls%20Treves%201998%20Capacity%20of%20pattern%20](http://www.oxcns.org/papers/Rolls%20Treves%201998%20Capacity%20of%20pattern%20association%20networks.pdf)  
636 [association%20networks.pdf](http://www.oxcns.org/papers/Rolls%20Treves%201998%20Capacity%20of%20pattern%20association%20networks.pdf).
- 637 Sahay A, Scobie KN, Hill AS, O'Carroll CM, Kheirbek MA, Burghardt NS, Fenton AA, Dranovsky  
638 A, Hen R (2011) Increasing adult hippocampal neurogenesis is sufficient to improve pattern  
639 separation. *Nature* 472:466–470.
- 640 Sando R, Bushong E, Zhu Y, Huang M, Considine C, Phan S, Ju S, Uytiepo M, Ellisman M,  
641 Maximov A (2017) Assembly of Excitatory Synapses in the Absence of Glutamatergic  
642 Neurotransmission. *Neuron* 94:312–321.e3.
- 643 Sato M, Stryker MP (2008) Distinctive features of adult ocular dominance plasticity. *J Neurosci*  
644 28:10278–10286.
- 645 Saxe MD, Battaglia F, Wang J-W, Malleret G, David DJ, Monckton JE, Garcia ADR, Sofroniew  
646 MV, Kandel ER, Santarelli L, Others (2006) Ablation of hippocampal neurogenesis impairs  
647 contextual fear conditioning and synaptic plasticity in the dentate gyrus. *Proceedings of the*  
648 *National Academy of Sciences* 103:17501–17506.
- 649 Schiavo G, Benfenati F, Poulain B, Rossetto O, Polverino de Laureto P, DasGupta BR,  
650 Montecucco C (1992) Tetanus and botulinum-B neurotoxins block neurotransmitter release  
651 by proteolytic cleavage of synaptobrevin. *Nature* 359:832–835.
- 652 Schmidt-Hieber C, Jonas P, Bischofberger J (2004) Enhanced synaptic plasticity in newly

- 653 generated granule cells of the adult hippocampus. *Nature* 429:184–187.
- 654 Tagawa Y, Kanold PO, Majdan M, Shatz CJ (2005) Multiple periods of functional ocular  
655 dominance plasticity in mouse visual cortex. *Nat Neurosci* 8:380–388.
- 656 Toni N, Laplagne DA, Zhao C, Lombardi G, Ribak CE, Gage FH, Schinder AF (2008) Neurons  
657 born in the adult dentate gyrus form functional synapses with target cells. *Nat Neurosci*  
658 11:901–907.
- 659 Toni N, Teng EM, Bushong EA, Aimone JB, Zhao C, Consiglio A, van Praag H, Martone ME,  
660 Ellisman MH, Gage FH (2007) Synapse formation on neurons born in the adult  
661 hippocampus. *Nat Neurosci* 10:727–734.
- 662 Tovar KR, Maher BJ, Westbrook GL (2009) Direct actions of carbenoxolone on synaptic  
663 transmission and neuronal membrane properties. *J Neurophysiol* 102:974–978.
- 664 Tronel S, Belnoue L, Grosjean N, Revest J-M, Piazza P-V, Koehl M, Abrous DN (2012) Adult-  
665 born neurons are necessary for extended contextual discrimination. *Hippocampus* 22:292–  
666 298.
- 667 Tsao A, Moser M-B, Moser EI (2013) Traces of experience in the lateral entorhinal cortex. *Curr*  
668 *Biol* 23:399–405.
- 669 Van Cauter T, Camon J, Alvernhe A, Elduayen C, Sargolini F, Save E (2013) Distinct roles of  
670 medial and lateral entorhinal cortex in spatial cognition. *Cereb Cortex* 23:451–459.
- 671 van Praag H, Schinder AF, Christie BR, Toni N, Palmer TD, Gage FH (2002) Functional  
672 neurogenesis in the adult hippocampus. *Nature* 415:1030–1034.
- 673 Vivar C, Potter MC, Choi J, Lee J-Y, Stringer TP, Callaway EM, Gage FH, Suh H, van Praag H  
674 (2012) Monosynaptic inputs to new neurons in the dentate gyrus. *Nat Commun* 3:1107.
- 675 Walsh MK, Lichtman JW (2003) In vivo time-lapse imaging of synaptic takeover associated with  
676 naturally occurring synapse elimination. *Neuron* 37:67–73.
- 677 Witter MP (2007) The perforant path: projections from the entorhinal cortex to the dentate gyrus.  
678 *Prog Brain Res* 163:43–61.
- 679 Yasuda M, Mayford MR (2006) CaMKII activation in the entorhinal cortex disrupts previously  
680 encoded spatial memory. *Neuron* 50:309–318.
- 681 Yoganasimha D, Rao G, Knierim JJ (2011) Lateral entorhinal neurons are not spatially  
682 selective in cue-rich environments. *Hippocampus* 21:1363–1374.
- 683 Yuste R, Bonhoeffer T (2004) Genesis of dendritic spines: insights from ultrastructural and  
684 imaging studies. *Nat Rev Neurosci* 5:24–34.
- 685 Zhao C, Teng EM, Summers RG Jr, Ming G-L, Gage FH (2006) Distinct morphological stages of  
686 dentate granule neuron maturation in the adult mouse hippocampus. *J Neurosci* 26:3–11.
- 687 Ziv NE, Garner CC (2001) Principles of glutamatergic synapse formation: seeing the forest for  
688 the trees. *Curr Opin Neurobiol* 11:536–543.

689 **Figure Legends:**

690

691 **Figure 1: Laminar specific electrical and optical stimulation.** (A) Circuit schematic  
692 demonstrating laminar specific input from medial entorhinal cortex (MEC) and lateral entorhinal  
693 cortex (LEC). Within the molecular layer of the dentate gyrus, MEC axons reside in the middle  
694 molecular layer (MML) whereas lateral entorhinal cortex axons reside in the outer molecular  
695 layer (OML). (B) Demonstration of laminar specific input using field EPSP recordings. When the  
696 field recording electrode and bipolar electrode are within the same layer, a current sink is  
697 observed as a negative voltage deflection. A current source can be observed when the field  
698 electrode and bipolar electrode are in adjacent layers. (C) Laminar specific expression of ChR2  
699 following viral injection into the medial entorhinal cortex (left) or lateral entorhinal cortex (right).  
700 Scale bar: 100  $\mu\text{m}$ . (D) Comparison of lamina-specific optogenetic stimulation in mature (black)  
701 and newborn cells (green). (E) Comparison of the strength of the maximal light evoked EPSCs  
702 from each lamina in mature and newborn (p21) granule cells.

703

704 **Figure 2: Synaptic maturation and development** (A) Spine density measurements in MML  
705 (top) and OML (bottom) at 3 and 6 week old dentate granule cells. Scale bar: 5  $\mu\text{m}$ . (B)  
706 Developmental increase in spine density across cell development in middle molecular layer  
707 (black) and outer molecular layer (red). *Inset:* Average spine density across layers increases  
708 between 3 and 4 weeks post-mitosis, then remains constant between 4 and 12 weeks. (C)  
709 Developmental increase in the percentage of spines with filopodial morphology in both MML  
710 (black) and OML (red). (D) Miniature EPSC recordings in the presence of 10  $\mu\text{M}$  SR95531 and  
711 1  $\mu\text{M}$  TTX to isolate excitatory events. mEPSCs were recorded at 3 and 6 weeks post mitosis.  
712 (E) There was no difference in the miniature EPSC frequency at 3 and 6 weeks post mitosis. (F)  
713 There was a significant decrease in miniature EPSC amplitude, suggesting weaker synaptic  
714 inputs at 6 weeks post-mitosis.

715

716 **Figure 3: Silencing synaptic input with Tetanus toxin expression** (A) Comparison of  
717 synaptic responses in autaptically cultured neurons in control (left) and following tetanus toxin  
718 infection (TeNT). (B) Expression of TeNT completely abolishes synaptic responses in  
719 autaptically cultured neurons. (C) Schematic of TeNT viral injection into the medial entorhinal  
720 cortex, which will functionally silence axons in the middle molecular layer of the dentate gyrus.  
721 (D) Expression of TeNT in the middle molecular layer dramatically reduces the intensity of  
722 VGlut1 expression in the middle molecular layer, indicating a disruption of presynaptic function.

723 Scale bar: 100  $\mu\text{m}$ . (E) TeNT expression did not elicit astrogliosis. (F, G) Electron micrographs  
724 from control (F) and TeNT overexpressing (G) axons. TeNT expression results in axonal  
725 swelling and vesicle accumulation (b=axonal bouton, s=dendritic spine, arrowheads=synapse).  
726 Scale bar: 500 nm. (H) Field EPSP recordings from the middle molecular layer while electrically  
727 stimulating the medial perforant path fibers. (I) fEPSP responses were significantly attenuated  
728 when TeNT was expressed in the MML, without changing fiber volley amplitudes.

729

730 **Figure 4: Silencing the middle molecular layer impairs normal synaptic innervation in the**

731 **outer molecular layer.** (A) Expression of ChR2 in the outer molecular layer, with TeNT  
732 expression in the middle molecular layer (MML:TeNT). Scale bar: 100  $\mu\text{m}$ . (B) Comparison of  
733 synaptic responses in mature neurons (top) and newborn neurons (bottom) in control and  
734 MML:TeNT conditions. (C) TeNT expression in the MML significantly reduces the amplitude of  
735 OML-evoked responses selectively in newborn cells. (D) MML:TeNT expression increases the  
736 paired pulse ratio of OML axons, selectively in newborn cells. (E) Retroviral labeling of newborn  
737 dentate granule cells in control (left) and with MML:TeNT (right). Scale bar: 35  $\mu\text{m}$ . (F, G) Spine  
738 density is significantly reduced in both MML and OML following MML:TeNT expression. Scale  
739 bar in (F): 2.5  $\mu\text{m}$ .

740

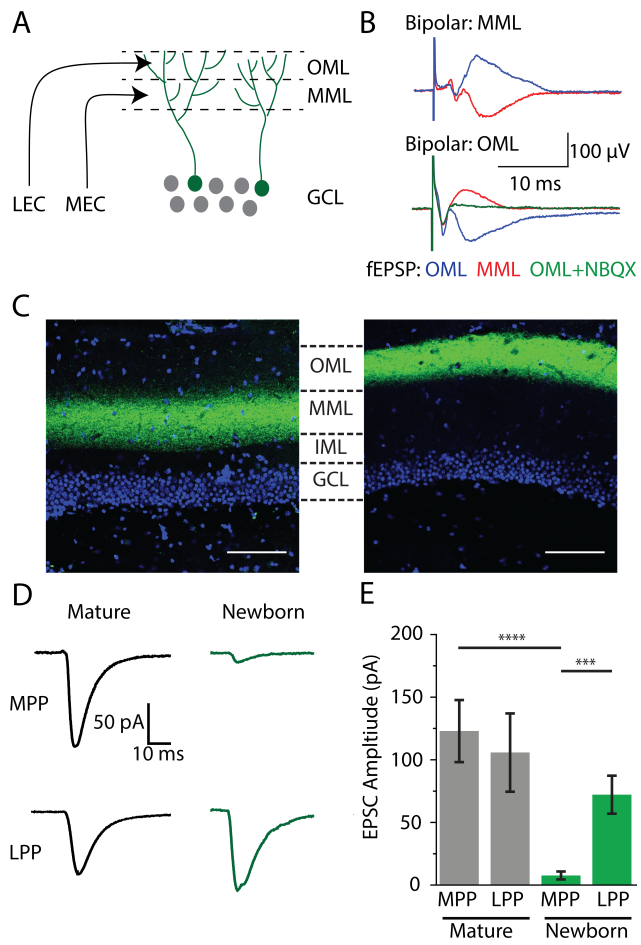

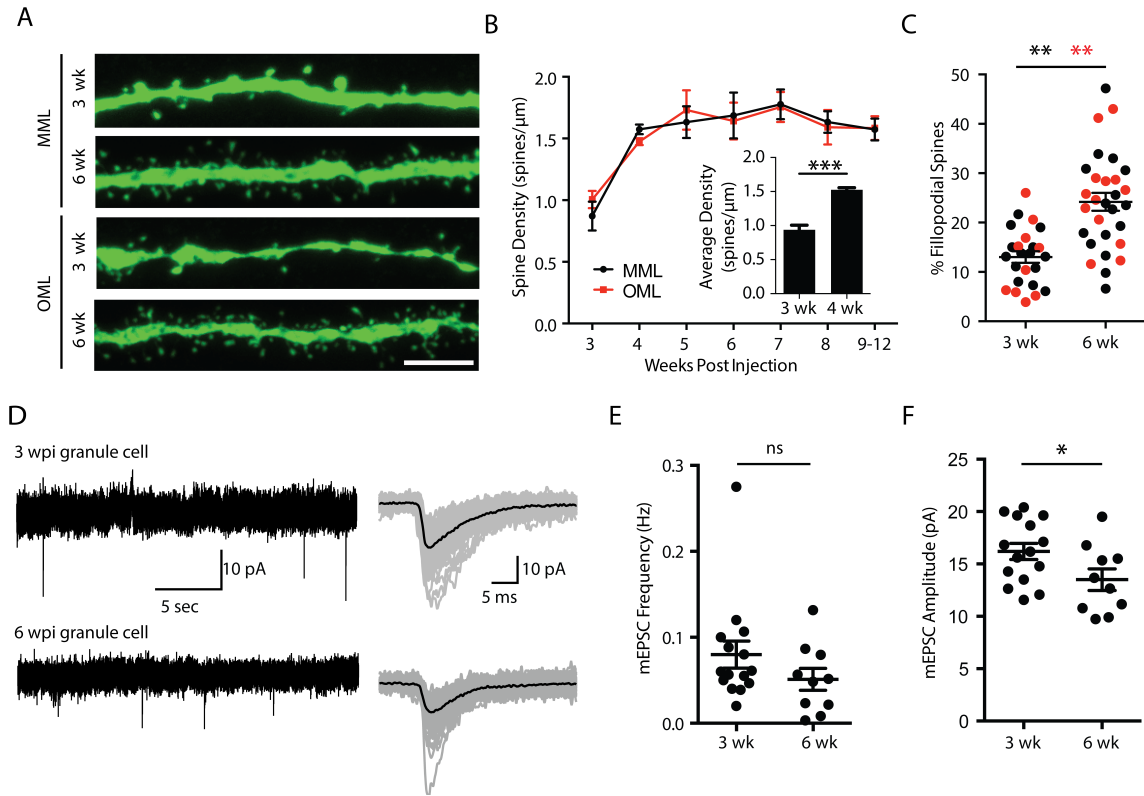

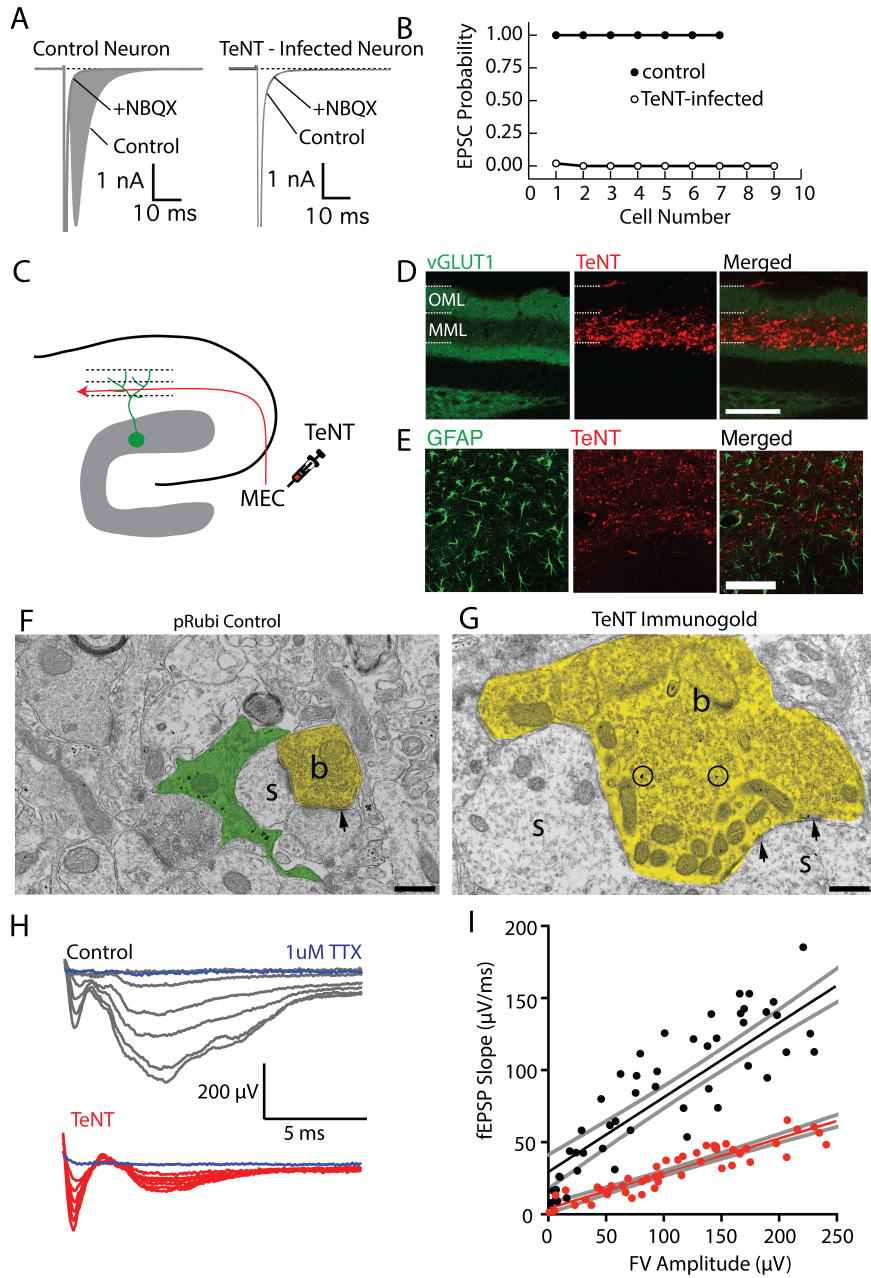



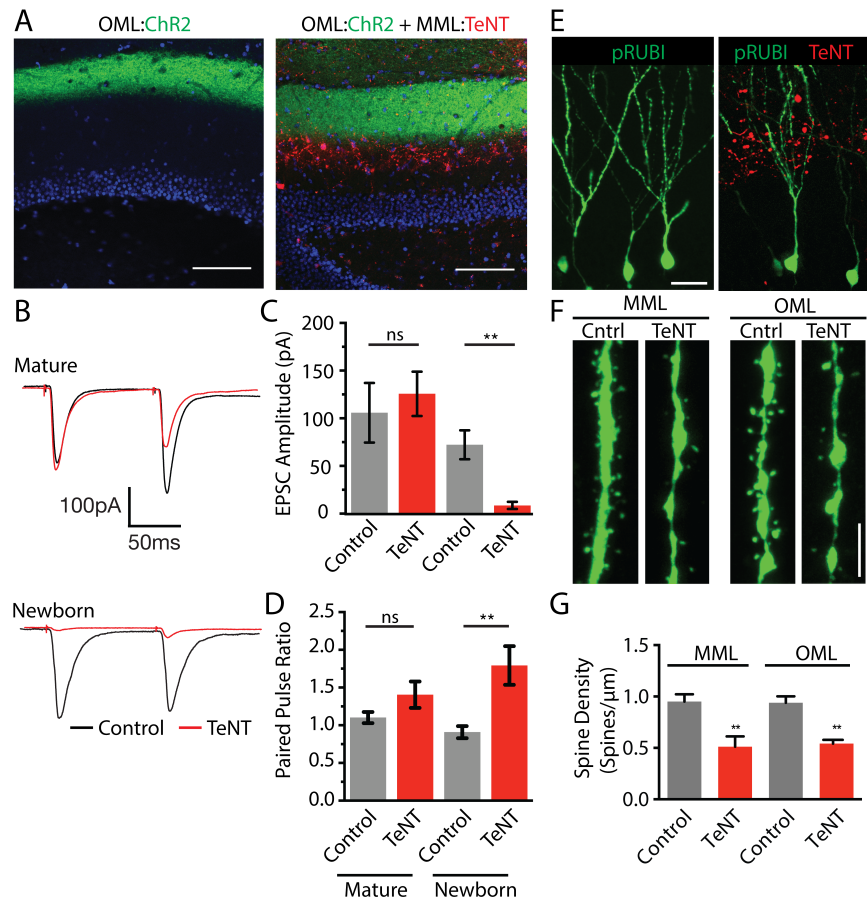

Source: https://www.biorxiv.org/content/10.1101/153767v1.full.pdf
